# Supplementary material for: Modeling the formation and composition of secondary organic aerosol from diesel exhaust using parameterized and semi-explicit chemistry and thermodynamic models
Source: Copernicus journal article supplement (doi:10.5194/acp-18-13813-2018), 2018-10-01
Supplement: Supplementary file 1 [file acp-18-13813-2018-supplement.zip]

Archive with 2 entries (2 files):
- acp-18-13813-2018-supplement-title-page.pdf
- SOM-VBSpaper_SI_v5.docx
