# Supplementary material for: Modeling the formation and composition of secondary organic aerosol from diesel exhaust using parameterized and semi-explicit chemistry and thermodynamic models
Source: Copernicus journal article supplement (doi:10.5194/acp-18-13813-2018), 2018-10-01
Supplement: Supplementary file 1 [file acp-18-13813-2018-supplement.zip › acp-18-13813-2018-supplement-title-page.pdf]

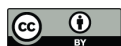

## *Supplement of*

# **Modeling the formation and composition of secondary organic aerosol from diesel exhaust using parameterized and semi-explicit chemistry and thermodynamic models**

**Sailaja Eluri et al.**

*Correspondence to:* Shantanu H. Jathar ([shantanu.jathar@colostate.edu](mailto:shantanu.jathar@colostate.edu))

- [acp-18-13813-2018-supplement-title-page.pdf](#)
- [SOM-VBSpaper\\_SI\\_v5.docx](#)

The copyright of individual parts of the supplement might differ from the CC BY 4.0 License.
