# Supplementary material for: Modeling the formation and composition of secondary organic aerosol from diesel exhaust using parameterized and semi-explicit chemistry and thermodynamic models
Source: Copernicus journal article supplement (doi:10.5194/acp-18-13813-2018), 2018-10-01
Supplement: Supplementary file 1 [file acp-18-13813-2018-supplement.zip › SOM-VBSpaper_SI_v5.docx]

**Supporting Information for Modeling the Formation and Composition of Secondary Organic Aerosol from Diesel Exhaust Using Parameterized and Semi-explicit Chemistry and Thermodynamic Models**

Sailaja Eluri1, Christopher D. Cappa2, Beth Friedman3, Delphine K. Farmer3, and Shantanu H. Jathar1

1 Department of Mechanical Engineering, Colorado State University, Fort Collins, CO, USA, 80523

2 Department of Civil and Environmental Engineering, University of California Davis, Davis, CA, USA, 95616

3 Department of Chemistry, Colorado State University, Fort Collins, CO, USA, 80523

Correspondence to: Shantanu H. Jathar ([shantanu.jathar@colostate.edu](mailto:shantanu.jathar@colostate.edu))

*Table S1: Predictions of rRO2+NO/rRO2+HO2 from the model of Peng and Jimenez (2017) for all photon fluxes in the OFR and all experiments of Jathar et al. (2017a). Cells shaded in ochre show photon flux-experiment combinations where the of rRO2+*NO *exceeded the* rRO2*+HO2. The uncertainty in the calculated ratio is a factor of 3 (personal communication with Dr. Zhe Peng, first author of Peng and Jimenez (2017)).*

| ***Experiment*** | ***Date*** | ***Photon Flux (photons cm-2 s-1)*** | | | | |
| --- | --- | --- | --- | --- | --- | --- |
| ***4.19E+12*** | ***8.68E+12*** | ***1.31E+13*** | ***1.74E+13*** | ***3.90E+13*** |
| Idle-Diesel-None | June 3 | 1.30E+01 | 1.56E+00 | 6.20E-01 | 3.60E-01 | 1.00E-01 |
| June 5 | 9.30E+00 | 1.35E+00 | 5.70E-01 | 3.40E-01 | 1.00E-01 |
| June 12 | 1.82E+03 | 6.99E+00 | 1.94E+00 | 9.10E-01 | 1.90E-01 |
| Idle-Biodiesel-None | June 4 | 9.78E+00 | 1.31E+00 | 5.30E-01 | 3.10E-01 | 9.00E-02 |
| June 8 | 2.51E+02 | 4.34E+00 | 1.36E+00 | 6.80E-01 | 1.50E-01 |
| Load-Diesel-None | June 3 | 7.18E+05 | 7.31E+04 | 2.20E+02 | 2.95E+01 | 7.30E-01 |
| June 5 | 1.70E+06 | 3.83E+05 | 3.43E+04 | 2.74E+02 | 2.17E+00 |
| Load- Biodiesel-None | June 4 | 1.55E+06 | 3.24E+05 | 1.75E+04 | 1.77E+02 | 1.77E+00 |
| June 8 | 5.75E+06 | 1.97E+06 | 8.13E+05 | 2.87E+05 | 3.67E+01 |
| Idle-Diesel-DPF+DOC | June 9 | 2.16E+04 | 1.83E+01 | 3.70E+00 | 1.50E+00 | 2.30E-01 |
| Load-Diesel-DPF+DOC | June 9 | 1.50E+06 | 2.96E+05 | 1.06E+04 | 1.39E+02 | 1.56E+00 |
| Idle-Biodiesel-DPF+DOC | June 10 | 1.47E+04 | 1.39E+01 | 3.02E+00 | 1.25E+00 | 2.00E-01 |
| Load-Biodiesel-DPF+DOC | June 10 | 1.11E+06 | 1.66E+05 | 9.77E+02 | 5.87E+01 | 9.70E-01 |

*Table S2: Mass speciation and kOH for VOC emissions profile #3161.*

| ***Species Name*** | ***kOH (cm3 molecules-1 s-1)*** | ***Mass Percent (%)*** |
| --- | --- | --- |
| (1-methylpropyl) benzene |  | 0.041 |
| (2-methylpropyl) benzene |  | 0.106 |
| 1,2,3-trimethylbenzene |  | 0.097 |
| 1,2,4-trimethylbenzene |  | 0.430 |
| 1,2-diethylbenzene |  | 0.073 |
| 1,2-propadiene |  | 0.381 |
| 1,3,5-trimethylbenzene |  | 0.154 |
| 1,3-butadiene |  | 0.154 |
| 1-butene |  | 0.544 |
| 1-methyl-2-ethylbenzene |  | 0.114 |
| 1-methyl-3-ethylbenzene |  | 0.203 |
| 1-pentene |  | 0.260 |
| 2,2,4-trimethylpentane |  | 0.244 |
| 2,2-dimethylbutane |  | 0.049 |
| 2,3,4-trimethylpentane |  | 0.016 |
| 2,3-dimethyl-1-butene |  | 0.024 |
| 2,3-dimethylhexane |  | 0.008 |
| 2,3-dimethylpentane |  | 0.057 |
| 2,4-dimethylhexane |  | 0.032 |
| 2,4-dimethylpentane |  | 0.016 |
| 2-methylheptane |  | 0.049 |
| 2-methylhexane |  | 0.097 |
| 2-methylpentane |  | 0.317 |
| 3,3-dimethyl-1-butene |  | 2.289 |
| 3-ethylhexane |  | 0.049 |
| 3-methylhexane |  | 0.284 |
| 3-methylpentane |  | 0.097 |
| acetaldehyde |  | 5.966 |
| acetone |  | 6.096 |
| acetylene |  | 3.450 |
| alkene ketone |  | 1.420 |
| b-methylstyrene |  | 0.041 |
| benzaldehyde |  | 0.568 |
| benzene |  | 1.623 |
| butyraldehyde |  | 1.518 |
| c10 aromatics |  | 0.065 |
| c5 aldehyde |  | 0.089 |
| c6 aldehydes |  | 3.084 |
| c9 aromatics |  | 0.406 |
| cis-2-butene |  | 0.073 |
| cis-2-pentene |  | 0.024 |
| cyclohexane |  | 0.024 |
| cyclohexanone |  | 0.089 |
| cyclopentane |  | 0.008 |
| ethane |  | 0.463 |
| ethyl alcohol |  | 0.008 |
| ethylbenzene |  | 0.252 |
| ethylene |  | 11.672 |
| formaldehyde |  | 11.940 |
| indan |  | 0.154 |
| isobutane |  | 0.990 |
| isobutylene |  | 0.747 |
| butylbenzene |  | 0.106 |
| diethylbenzene |  | 0.114 |
| isopentane |  | 0.487 |
| isopropylbenzene |  | 0.016 |
| *m*-xylene |  | 0.495 |
| methane |  | 3.312 |
| methyl alcohol |  | 0.024 |
| methyl ethyl ketone |  | 1.201 |
| 2-hexanone |  | 0.731 |
| methylcyclohexane |  | 0.057 |
| methylcyclopentane |  | 0.122 |
| *n*-butane |  | 0.081 |
| *n*-decane |  | 0.430 |
| *n*-heptane |  | 0.057 |
| *n*-hexane |  | 0.130 |
| *n*-nonane |  | 0.187 |
| *n*-octane |  | 0.114 |
| *n*-pentane |  | 0.146 |
| *n*-propylbenzene |  | 0.097 |
| *n*-undecane |  | 0.211 |
| naphthalene |  | 0.073 |
| *o*-xylene |  | 0.276 |
| *p*-xylene |  | 0.081 |
| propane |  | 0.154 |
| propionaldehyde |  | 0.787 |
| propylene |  | 2.110 |
| styrene |  | 0.049 |
| t-butylbenzene |  | 0.008 |
| unknown |  | 0.000 |
| trans-2-butene |  | 0.162 |
| trans-2-pentene |  | 0.032 |
| toluene |  | 1.193 |
| C12 branched alkane |  | 1.133 |
| C13 branched alkane |  | 0.811 |
| C14 branched alkane |  | 0.526 |
| C15 branched alkane |  | 0.469 |
| C16 branched alkane |  | 0.494 |
| C17 branched alkane |  | 0.220 |
| C18 branched alkane |  | 0.286 |
| C19 branched alkane |  | 0.172 |
| C20 branched alkane |  | 0.097 |
| C21 branched alkane |  | 0.064 |
| C22 branched alkane |  | 0.060 |
| C12 cyclic alkane |  | 4.343 |
| C13 cyclic alkane |  | 4.427 |
| C14 cyclic alkane |  | 3.148 |
| C15 cyclic alkane |  | 2.860 |
| C16 cyclic alkane |  | 2.185 |
| C17 cyclic alkane |  | 1.855 |
| C18 cyclic alkane |  | 1.690 |
| C19 cyclic alkane |  | 1.057 |
| C20 cyclic alkane |  | 0.590 |
| C21 cyclic alkane |  | 0.374 |
| C22 cyclic alkane |  | 0.314 |
| *n*-dodecane |  | 0.583 |
| *n*-tridecane |  | 0.547 |
| *n*-tetradecane |  | 0.365 |
| *n*-pentadecane |  | 0.306 |
| *n*-hexadecane |  | 0.228 |
| *n*-heptadecane |  | 0.166 |
| *n*-octadecane |  | 0.148 |
| *n*-nonadecane |  | 0.073 |
| *n-*eicosane |  | 0.036 |
| *n-*heneicosane |  | 0.022 |
| *n-*docosane |  | 0.014 |
| pristane |  | 0.143 |
| phytane |  | 0.080 |
| naphthalene |  | 0.104 |
| phenanthrene |  | 0.012 |

*Table S3: Mass speciation and kOH for VOC emissions profile #8774.*

| ***Species Name*** | ***kOH (cm3 molecules-1 s-1)*** | ***Mass Percent (%)*** |
| --- | --- | --- |
| 1,2,3,5-tetramethylbenzene |  | 0.120 |
| 1,2,3-trimethylbenzene |  | 0.087 |
| 1,2,4,5-tetramethylbenzene |  | 0.058 |
| 1,2,4-trimethylbenzene |  | 0.037 |
| 1,2-butadiene |  | 0.018 |
| 1,3,5-trimethylbenzene |  | 0.073 |
| 1,3-butadiene |  | 0.602 |
| 1,3-diethylbenzene |  | 0.119 |
| 1,3-hexadiene |  | 0.026 |
| 1,4-diethylbenzene |  | 0.159 |
| 1-butene |  | 1.526 |
| 1-heptene |  | 0.266 |
| 1-methyl-2-ethylbenzene |  | 0.137 |
| 1-methyl-3-ethylbenzene |  | 0.082 |
| 1-methyl-4-ethylbenzene |  | 0.069 |
| 1-methylindan |  | 0.049 |
| 1-pentene |  | 0.319 |
| 1-propyne |  | 0.155 |
| 2,2,4-trimethylpentane |  | 0.458 |
| 2,2,5-trimethylhexane |  | 0.100 |
| 2,2-dimethylbutane |  | 0.075 |
| 2,3,4-trimethylpentane |  | 0.056 |
| 2,3-dimethyl-2-pentene |  | 0.004 |
| 2,3-dimethylbutane |  | 0.118 |
| 2,3-dimethylhexane |  | 0.012 |
| 2,3-dimethylpentane |  | 0.136 |
| 2,4-dimethylpentane |  | 0.425 |
| 2,6-dimethylheptane |  | 0.001 |
| 2-methyl-1-butene |  | 0.181 |
| 2-methyl-1-pentene |  | 4.958 |
| 2-methyl-2-butene |  | 0.204 |
| 2-methyl-2-pentene |  | 0.022 |
| 2-methylheptane |  | 0.108 |
| 2-methylhexane |  | 0.123 |
| 2-methylindan |  | 0.030 |
| 2-methylpentane |  | 0.069 |
| 3-methyl-cis-2-pentene |  | 0.016 |
| 3-methyl-trans-2-pentene |  | 0.193 |
| 3-methylheptane |  | 0.095 |
| 3-methylhexane |  | 0.228 |
| 3-methyloctane |  | 0.248 |
| 4-methylheptane |  | 0.031 |
| acetaldehyde |  | 3.899 |
| acetylene |  | 4.682 |
| alpha-pinene |  | 0.061 |
| benzaldehyde |  | 0.403 |
| benzene |  | 2.242 |
| beta-pinene |  | 0.001 |
| butyraldehyde |  | 0.900 |
| cis-2-butene |  | 0.172 |
| cis-2-hexene |  | 0.036 |
| cis-2-pentene |  | 0.093 |
| crotonaldehyde |  | 0.224 |
| cyclohexane |  | 0.210 |
| cyclohexene |  | 0.089 |
| cyclopentane |  | 0.067 |
| cyclopentene |  | 0.106 |
| dl-limonene |  | 0.021 |
| ethane |  | 1.294 |
| ethylbenzene |  | 0.257 |
| ethylene |  | 14.315 |
| formaldehyde |  | 6.220 |
| glyoxal |  | 0.518 |
| indan |  | 0.049 |
| isobutane |  | 0.534 |
| isopentane |  | 3.012 |
| isoprene |  | 0.107 |
| isopropylbenzene |  | 0.022 |
| isopropylcyclohexane |  | 0.263 |
| isopropyltoluene |  | 0.109 |
| *m* & *p*-xylene |  | 0.441 |
| 2-butanone |  | 2.097 |
| methylcyclohexane |  | 0.201 |
| methylcyclopentane |  | 3.125 |
| *n*-butane |  | 1.002 |
| *n*-butylbenzene |  | 0.037 |
| *n*-decane |  | 0.707 |
| *n*-heptane |  | 0.219 |
| *n*-hexane |  | 0.537 |
| *n*-nonane |  | 0.278 |
| *n*-octane |  | 0.254 |
| *n*-pentane |  | 0.548 |
| *n*-propylbenzene |  | 0.045 |
| *n*-undecane |  | 0.729 |
| *o*-xylene |  | 0.182 |
| *n*-propane |  | 1.558 |
| propionaldehyde |  | 0.450 |
| propylene |  | 4.108 |
| propyltoluene |  | 0.088 |
| styrene |  | 0.226 |
| tolualdehyde |  | 0.027 |
| toluene |  | 1.029 |
| trans-1,3-dichloropropene |  | 0.004 |
| trans-2-butene |  | 0.211 |
| trans-2-hexene |  | 0.064 |
| trans-2-pentene |  | 0.094 |
| valeraldehyde |  | 0.040 |
| C12 branched alkane |  | 1.133 |
| C13 branched alkane |  | 0.811 |
| C14 branched alkane |  | 0.526 |
| C15 branched alkane |  | 0.469 |
| C16 branched alkane |  | 0.494 |
| C17 branched alkane |  | 0.220 |
| C18 branched alkane |  | 0.286 |
| C19 branched alkane |  | 0.172 |
| C20 branched alkane |  | 0.097 |
| C21 branched alkane |  | 0.064 |
| C22 branched alkane |  | 0.060 |
| C12 cyclic alkane |  | 4.343 |
| C13 cyclic alkane |  | 4.427 |
| C14 cyclic alkane |  | 3.148 |
| C15 cyclic alkane |  | 2.860 |
| C16 cyclic alkane |  | 2.185 |
| C17 cyclic alkane |  | 1.855 |
| C18 cyclic alkane |  | 1.690 |
| C19 cyclic alkane |  | 1.057 |
| C20 cyclic alkane |  | 0.590 |
| C21 cyclic alkane |  | 0.374 |
| C22 cyclic alkane |  | 0.314 |
| *n*-dodecane |  | 0.583 |
| *n*-tridecane |  | 0.547 |
| *n*-tetradecane |  | 0.365 |
| *n*-pentadecane |  | 0.306 |
| *n*-hexadecane |  | 0.228 |
| *n*-heptadecane |  | 0.166 |
| *n*-octadecane |  | 0.148 |
| *n*-nonadecane |  | 0.073 |
| *n-*eicosane |  | 0.036 |
| *n-*heneicosane |  | 0.022 |
| *n-*docosane |  | 0.014 |
| pristane |  | 0.143 |
| phytane |  | 0.080 |
| naphthalene |  | 0.104 |
| phenanthrene |  | 0.012 |

*Table S4: Mass speciation and kOH for VOC emissions profile #4777.*

| ***Species Name*** | ***kOH (cm3 molecules-1 s-1)*** | ***Mass Percent (%)*** |
| --- | --- | --- |
| 1,1,4-trimethylcyclohexane |  | 0.094 |
| 1,2,4-trimethylbenzene |  | 0.472 |
| 1,2-dimethyl-4-ethylbenzene |  | 0.206 |
| 1,3,5-trimethylbenzene |  | 0.189 |
| 1,3-dimethyl-2-ethylbenzene |  | 0.330 |
| 1,4-dimethyl-2-ethylbenzene |  | 0.437 |
| 1-(1,1-dimethylethyl)-3,5-dimethylbenzene |  | 0.372 |
| 1-butene |  | 0.608 |
| 1-ethyl-1-methylcyclopentane |  | 0.041 |
| 1-hexene |  | 0.177 |
| 1-methyl-2-ethylbenzene |  | 0.383 |
| 1-methyl-2-tert-butylbenzene |  | 0.431 |
| 1-methyl-3-ethylbenzene |  | 0.720 |
| 1-methyl-3-isopropylbenzene |  | 0.442 |
| 1-methyl-3-propylbenzene |  | 0.271 |
| 1-methyl-4-ethylbenzene |  | 0.212 |
| 1-nonene |  | 0.071 |
| 1-pentene |  | 0.319 |
| 1-tert-butyl-4-ethylbenzene |  | 0.195 |
| 2,2,4-trimethylpentane |  | 0.230 |
| 2,2-dimethylbutane |  | 0.118 |
| 2,2-dimethylpropane |  | 0.059 |
| 2,3,4-trimethylpentane |  | 0.053 |
| 2,3-dimethylbutane |  | 0.024 |
| 2,3-dimethylhexane |  | 0.124 |
| 2,3-dimethylpentane |  | 0.018 |
| 2,4-dimethylhexane |  | 0.059 |
| 2,4-dimethylpentane |  | 0.012 |
| 2,5-dimethylheptane |  | 0.083 |
| 2,5-dimethylhexane |  | 0.029 |
| 2-methyl-butyl-benzene |  | 1.103 |
| 2-methylhexane |  | 0.342 |
| 2-methylnonane |  | 0.319 |
| 2-methyloctane |  | 0.106 |
| 2-methylpentane |  | 0.047 |
| 3,3-dimethyloctane |  | 0.307 |
| 3,3-dimethylpentane |  | 0.094 |
| 3,5-dimethylheptane |  | 0.088 |
| 3-ethyloctane |  | 0.189 |
| 3-ethylpentane |  | 0.035 |
| 3-methyl-1-butene |  | 0.130 |
| 3-methyl-cis-2-pentene |  | 0.083 |
| 3-methylheptane |  | 0.065 |
| 3-methylhexane |  | 0.024 |
| 3-methylnonane |  | 0.265 |
| 3-methylpentane |  | 0.083 |
| 4-methyl-1-pentene |  | 0.071 |
| 4-methylheptane |  | 0.555 |
| acetaldehyde |  | 3.162 |
| acetone |  | 4.466 |
| acetylene |  | 2.737 |
| acrolein |  | 0.885 |
| benzene |  | 1.599 |
| cis,trans-1,2,4-trimethylcyclohexane |  | 4.177 |
| cis-2-butene |  | 0.065 |
| cis-2-nonene |  | 0.112 |
| cis-2-octene |  | 0.053 |
| cis-3-hexene |  | 0.077 |
| crotonaldehyde |  | 0.265 |
| cyclohexane |  | 0.018 |
| cyclohexane |  | 0.083 |
| cyclopentane |  | 0.035 |
| cyclopentene |  | 0.053 |
| ethane |  | 0.201 |
| ethylbenzene |  | 0.083 |
| ethylene |  | 11.681 |
| formaldehyde |  | 10.885 |
| isobutane |  | 0.035 |
| isopentane |  | 0.401 |
| isopropylcyclohexane |  | 0.147 |
| isopropyltoluene |  | 0.360 |
| *m* & *p*-xylene |  | 0.372 |
| 2-butanone |  | 1.917 |
| methylbutadiene |  | 0.106 |
| methylcyclohexane |  | 0.100 |
| methylcyclopentane |  | 0.035 |
| *n*-butane |  | 0.094 |
| *n*-butylcyclopentane |  | 0.159 |
| *n*-decane |  | 1.705 |
| *n*-dodecane |  | 1.392 |
| *n*-heptane |  | 0.047 |
| *n*-hexane |  | 0.177 |
| *n*-nonane |  | 0.861 |
| *n*-octane |  | 0.484 |
| *n*-pentane |  | 0.088 |
| *n*-pentylbenzene |  | 0.212 |
| *n*-propylbenzene |  | 0.159 |
| *n*-tridecane |  | 0.614 |
| *n*-undecane |  | 1.941 |
| *o*-xylene |  | 0.395 |
| *n*-propane |  | 0.029 |
| propionaldehyde |  | 0.631 |
| propylcyclopentane |  | 0.059 |
| propylene |  | 2.560 |
| toluene |  | 1.640 |
| trans-1,2-dimethylcyclopentane |  | 1.528 |
| trans-1,4-dimethylcyclohexane |  | 0.065 |
| trans-2-butene |  | 0.088 |
| trans-2-heptene |  | 0.035 |
| trans-2-octene |  | 0.083 |
| trans-2-pentene |  | 0.053 |
| trans-3-nonene |  | 0.100 |
| C12 branched alkane |  | 1.133 |
| C13 branched alkane |  | 0.811 |
| C14 branched alkane |  | 0.526 |
| C15 branched alkane |  | 0.469 |
| C16 branched alkane |  | 0.494 |
| C17 branched alkane |  | 0.220 |
| C18 branched alkane |  | 0.286 |
| C19 branched alkane |  | 0.172 |
| C20 branched alkane |  | 0.097 |
| C21 branched alkane |  | 0.064 |
| C22 branched alkane |  | 0.060 |
| C12 cyclic alkane |  | 4.343 |
| C13 cyclic alkane |  | 4.427 |
| C14 cyclic alkane |  | 3.148 |
| C15 cyclic alkane |  | 2.860 |
| C16 cyclic alkane |  | 2.185 |
| C17 cyclic alkane |  | 1.855 |
| C18 cyclic alkane |  | 1.690 |
| C19 cyclic alkane |  | 1.057 |
| C20 cyclic alkane |  | 0.590 |
| C21 cyclic alkane |  | 0.374 |
| C22 cyclic alkane |  | 0.314 |
| *n*-dodecane |  | 0.583 |
| *n*-tridecane |  | 0.547 |
| *n*-tetradecane |  | 0.365 |
| *n*-pentadecane |  | 0.306 |
| *n*-hexadecane |  | 0.228 |
| *n*-heptadecane |  | 0.166 |
| *n*-octadecane |  | 0.148 |
| *n*-nonadecane |  | 0.073 |
| *n-*eicosane |  | 0.036 |
| *n-*heneicosane |  | 0.022 |
| *n-*docosane |  | 0.014 |
| pristane |  | 0.143 |
| phytane |  | 0.080 |
| naphthalene |  | 0.104 |
| Phenanthrene |  | 0.012 |

*Table S5:VBS and SOM model performance for OA mass at 0%,13.76%, 30%, and 60% IVOC mass fractions.*

| ***Aftertreatment*** | ***Model*** |  | ***Fractional Bias*** | | | |  | ***Fractional Error*** | | | ***R2*** | | | |
| --- | --- | --- | --- | --- | --- | --- | --- | --- | --- | --- | --- | --- | --- | --- |
|  | ***0%*** | | ***13.76%*** | ***30%*** | ***60%*** | ***0%*** | ***13.76%*** | ***30%*** | ***60%*** | ***0%*** | ***13.76%*** | ***30%*** | ***60%*** |
| None | VBS | -80% | | 5% | 54% | 37% | 127% | 84% | 107% | 87% | 0.73 | 0.84 | 0.68 | 0.84 |
| SOM | -94% | | -32% | 26% | 88% | 106% | 89% | 72% | 97% | 0.52 | 0.88 | 0.91 | 0.91 |
| DPF+DOC | VBS | -146% | | -119% | -17% | -44% | 159% | 133% | 97% | 63% | 0.77 | 0.96 | 0.98 | 0.99 |
| SOM | -143% | | -76% | -38% | 37% | 169% | 126% | 116% | 98% | 0.80 | 0.95 | 0.97 | 0.99 |
| All | VBS | -104% | | -41% | 32% | 37% | 139% | 102% | 104% | 87% | 0.64 | 0.83 | 0.73 | 0.86 |
| SOM | -109% | | -46% | 6% | 72% | 126% | 101% | 86% | 97% | 0.72 | 0.83 | 0.88 | 0.90 |

*Table S6: SOM performance for O:C predictions at 0%,13.76%, 30%, and 60% IVOC mass fractions.*

| ***Aftertreatment*** |  | | ***Fractional Bias*** | | |  | ***Fractional Error*** | | | ***R2*** | | | |
| --- | --- | --- | --- | --- | --- | --- | --- | --- | --- | --- | --- | --- | --- |
| ***0%*** | ***13.76%*** | | ***30%*** | ***60%*** | ***0%*** | ***13.76%*** | ***30%*** | ***60%*** | ***0%*** | ***13.76%*** | ***30%*** | ***60%*** |
| None | -19% | -33% | | -37% | -49% | 28% | 40% | 43% | 52% | 0.85 | 0.82 | 0.83 | 0.80 |
| DPF+DOC | 29% | -31% | | -37% | -84% | 35% | 35% | 41% | 84% | 0.37 | 0.02 | 0.02 | 0.29 |
| All | -4% | -32% | | -37% | -60% | 28% | 38% | 42% | 62% | 0.77 | 0.72 | 0.70 | 0.46 |

Figure S1: Scatter plot comparing SOM predictions of OA mass to VBS predictions from all experiments at all photochemical ages for the base case.

Figure S2: Measurements and model predictions from the 0% and 30% IVOC case of the OA O:C ratio presented as a function of photochemical age.

**Low NOX Yields for the VBS Model**

The Statistical Oxidation Model (SOM) was run to generate pseudo chamber data to determine the low NOX yields for the Volatility Basis Set (VBS) model. Pseudo chamber data were generated using the vapor wall loss-corrected SOM low NOX parameters for *n*-dodecane, methylundecane, and hexylcyclohexane. The SOM low NOX parameters for these species are listed in Table 5 in the main text. The *n*-dodecane, methylundecane, and hexylcyclohexane data were used to inform the VBS yields for linear, branched, and cyclic alkanes respectively for alkane precursors with carbon numbers ranging from 12 to 22. The SOM was setup with the same consistent inputs: initial precursor concentration of 40 ppbv, constant OH concentration of 5×106 molecules cm-3, and photochemical exposure of 6 hours. We assumed instantaneous partitioning of SOA. The pseudo chamber data were fit to develop VBS SOA mass yields over a C* range of 0.1 to 1000 µg m-3. These SOA mass yields are tabulated in the main text in Table 3.
